# Supplementary material for: Pestalafuranones F–J, Five New Furanone Analogues from the Endophytic Fungus Nigrospora sp. BM-2
Source: Molecules. 2014 Jan 10;19(1):819–25. doi: 10.3390/molecules19010819 (PMC6271264; doi:10.3390/molecules19010819)

# Supplementary Materials

**Figure S1.** HREIMS spectrum of Pestalafuranone F (**3**).

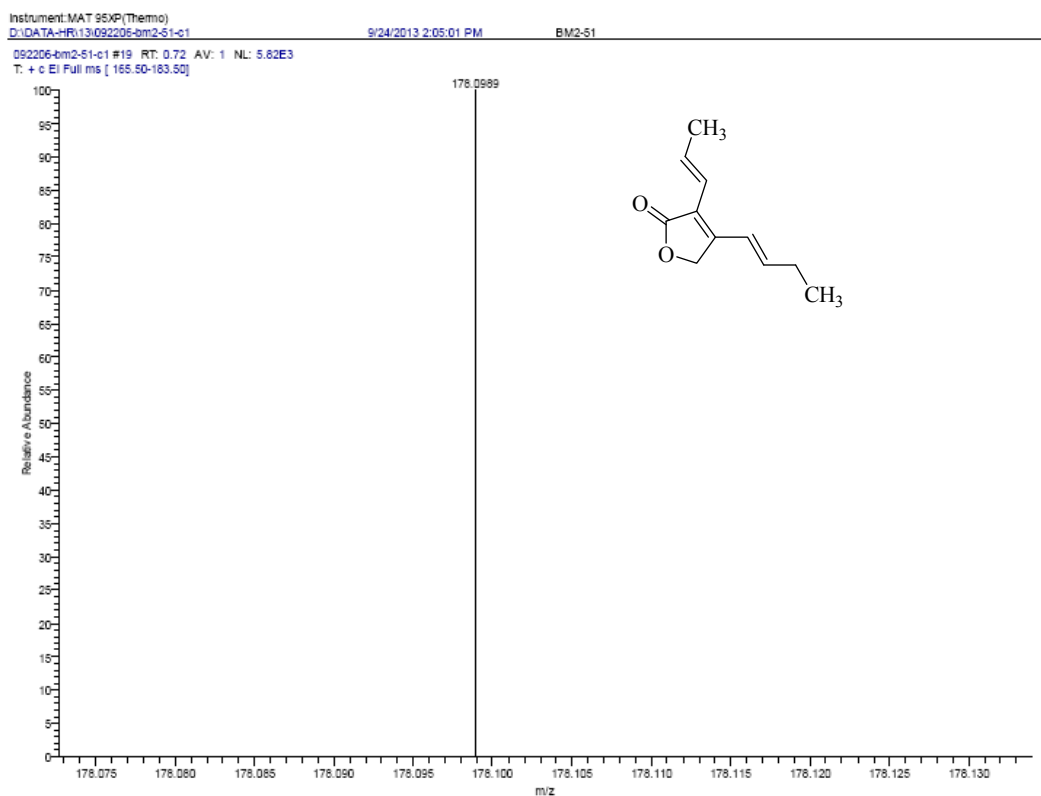

**Figure S2.**  $^1\text{H}$ -NMR spectrum of Pestalafuranone F (**3**) (400 MHz,  $\text{CDCl}_3$ ).

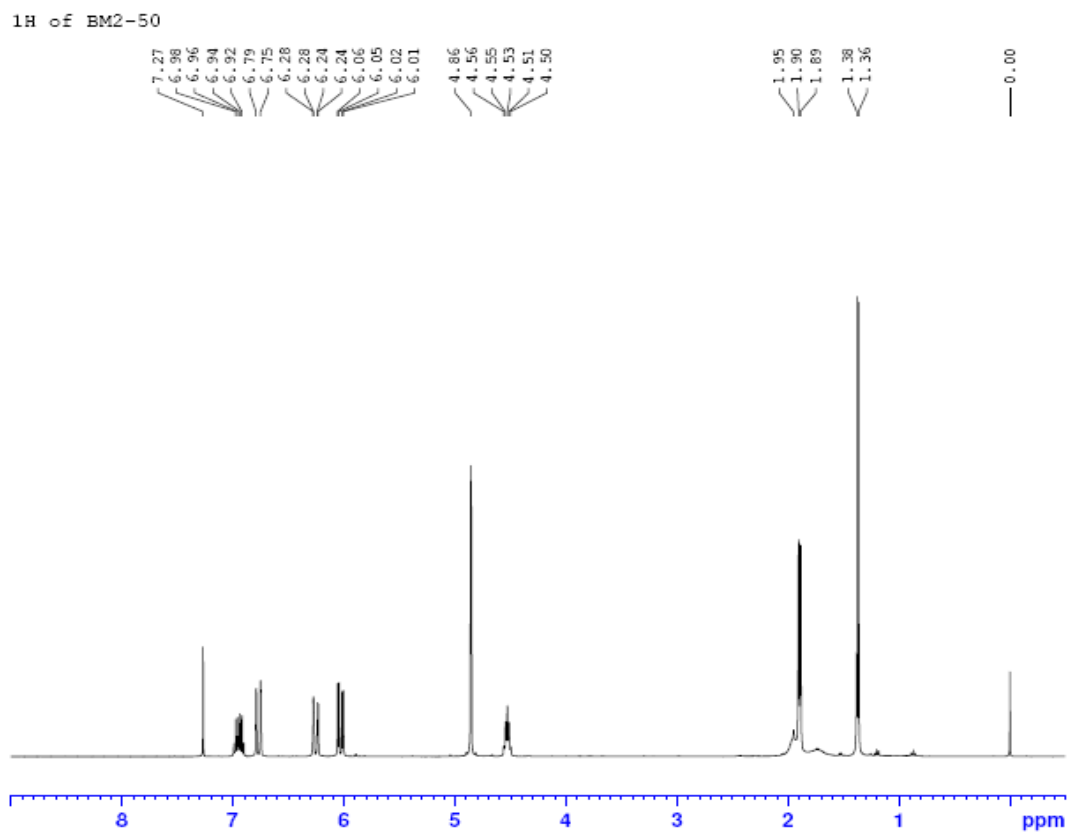

**Figure S3.**  $^{13}\text{C}$ -NMR spectrum of Pestalafuranone F (**3**) (100 MHz,  $\text{CDCl}_3$ ).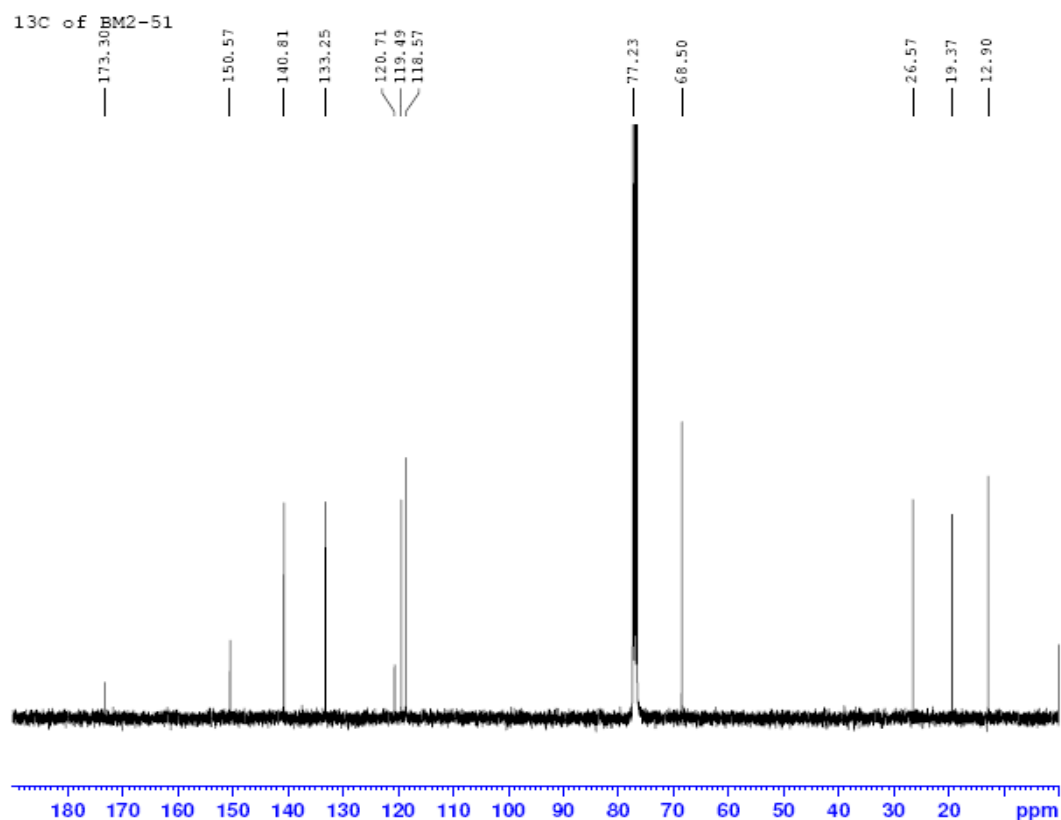**Figure S4.** HREIMS spectrum of Pestalafuranone G (**4**).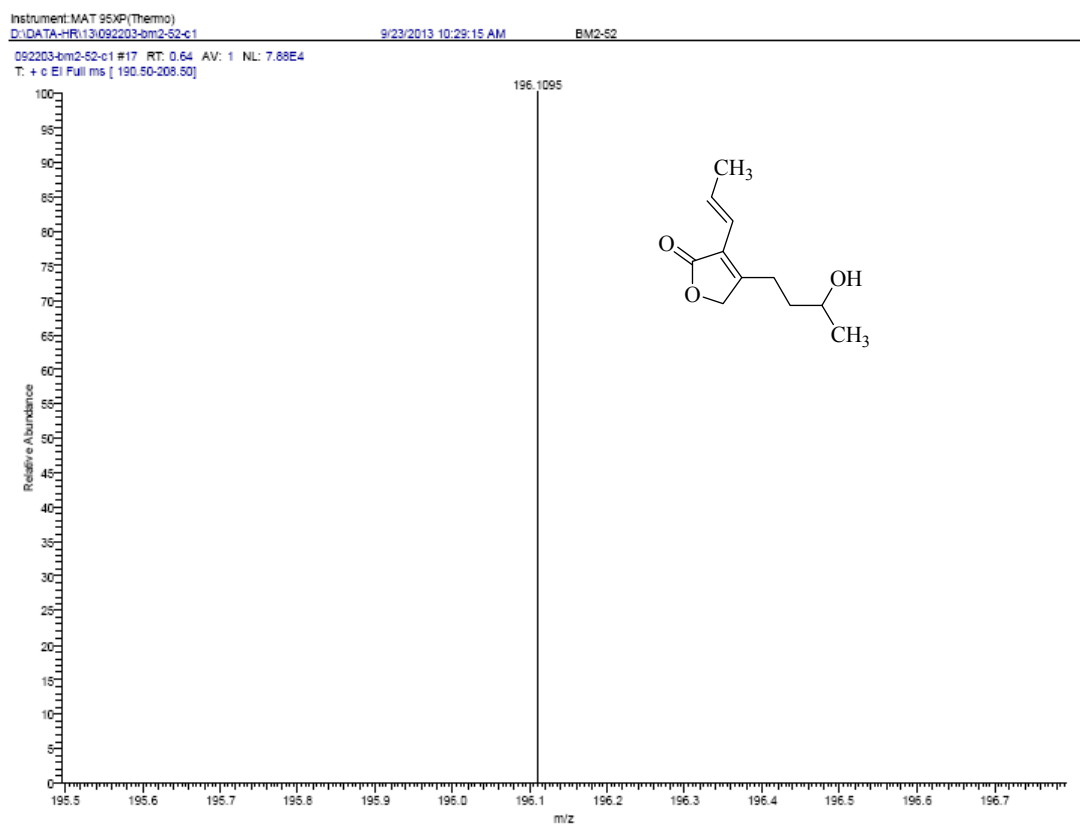

**Figure S5.**  $^1\text{H}$ -NMR spectrum of Pestalafuranone G (**4**) (400 MHz,  $\text{CDCl}_3$ ).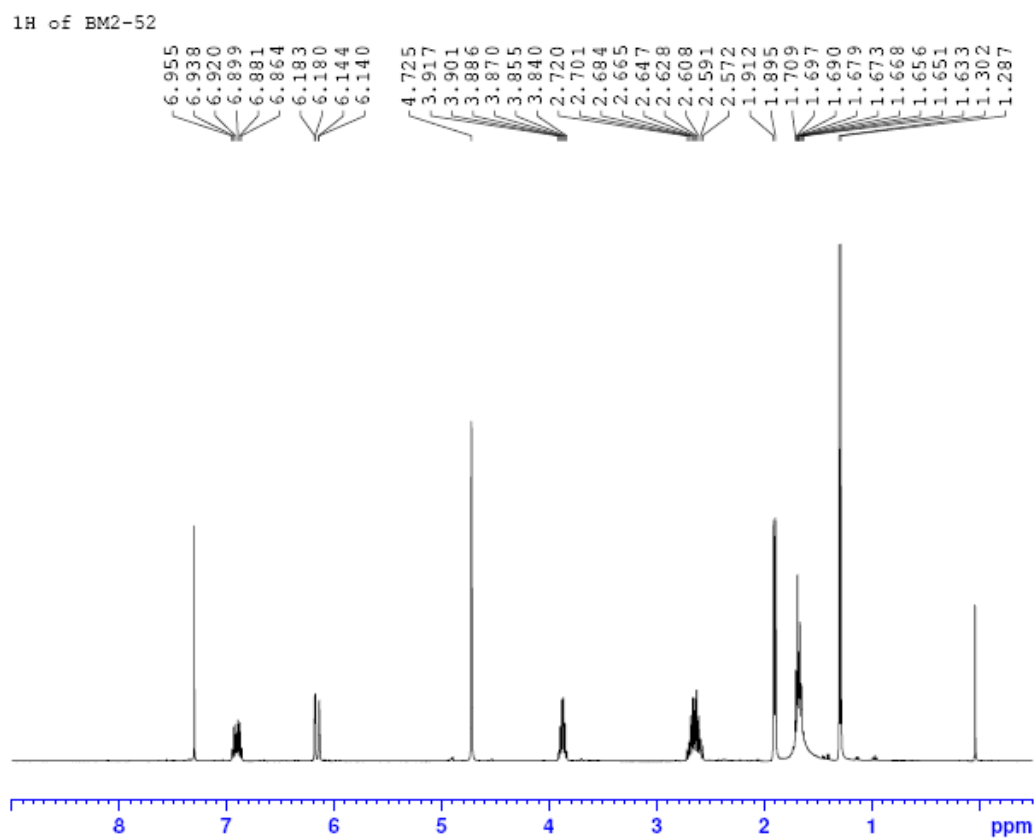**Figure S6.**  $^{13}\text{C}$ -NMR spectrum of Pestalafuranone G (**4**) (100 MHz,  $\text{CDCl}_3$ ).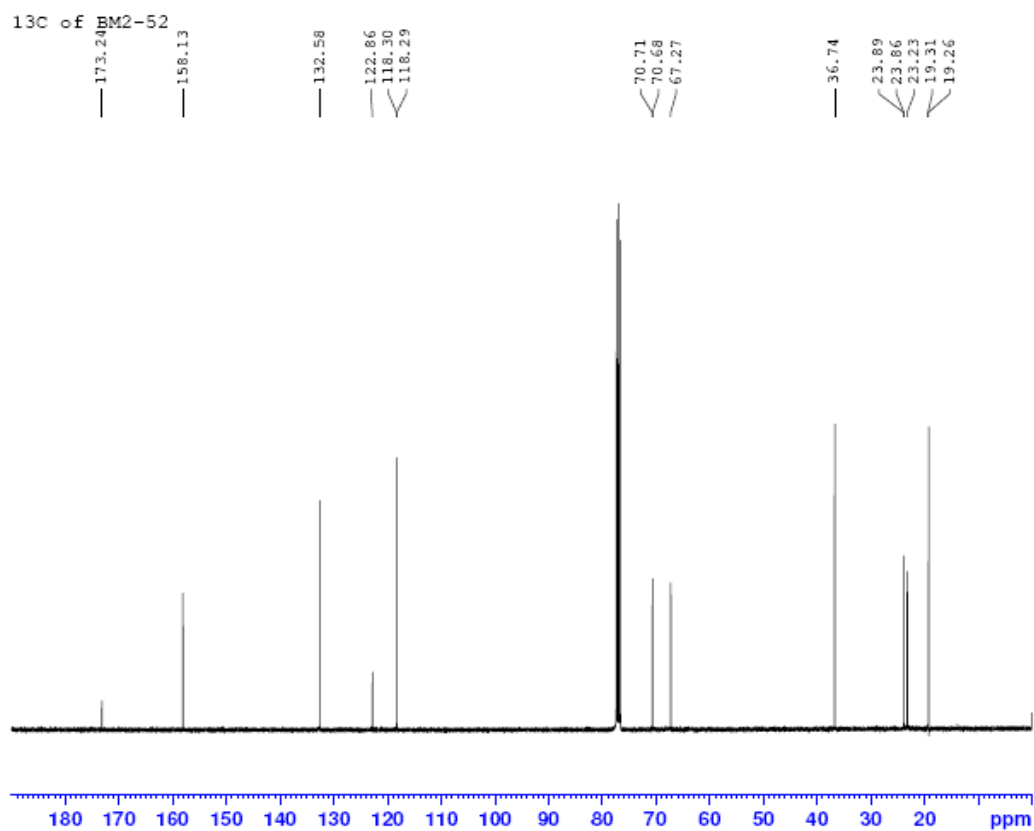

**Figure S7.** HREIMS spectrum of Pestalafuranone H (**5**).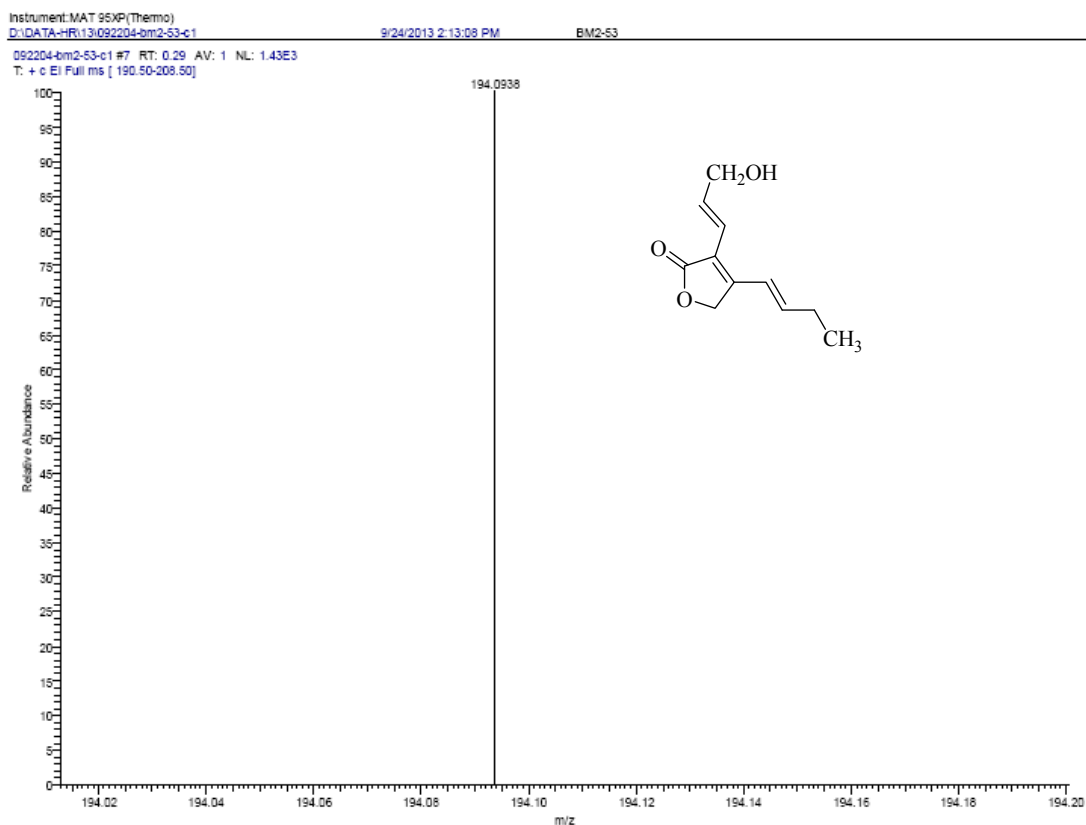**Figure S8.** <sup>1</sup>H-NMR spectrum of Pestalafuranone H (**5**) (400 MHz, CDCl<sub>3</sub>).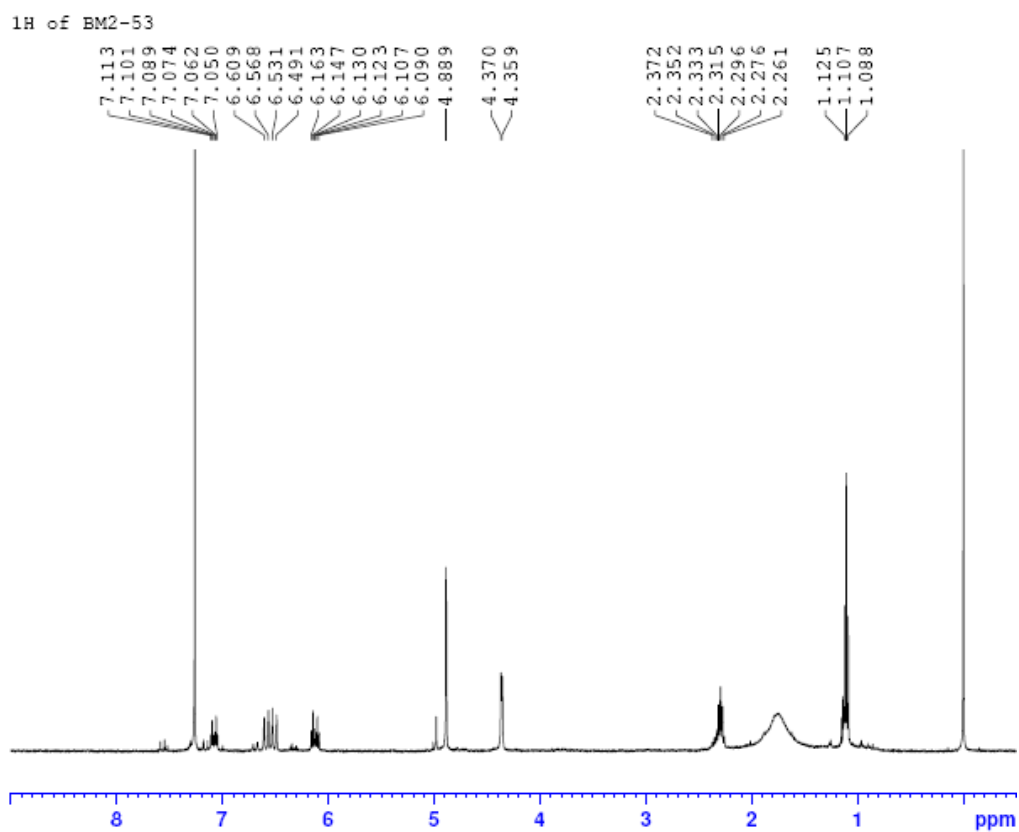

**Figure S9.**  $^{13}\text{C}$ -NMR spectrum of Pestalafuranone H (**5**) (100 MHz,  $\text{CDCl}_3$ ).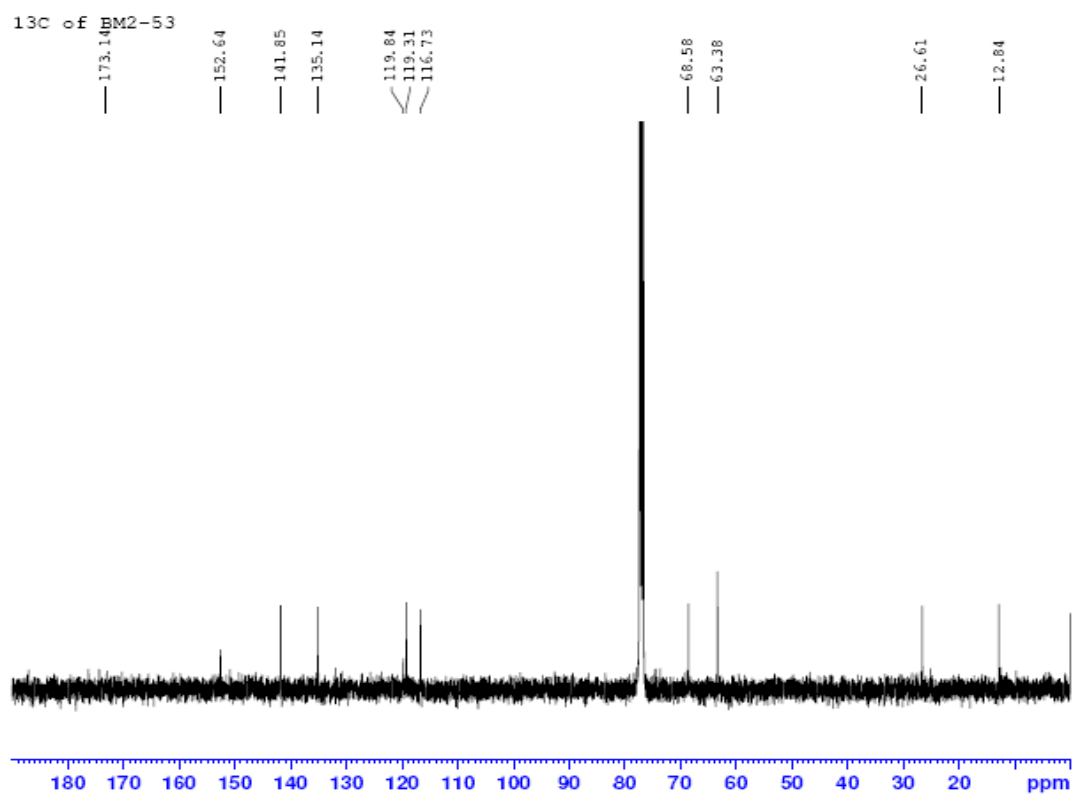**Figure S10.** HREIMS spectrum of Pestalafuranone I (**6**).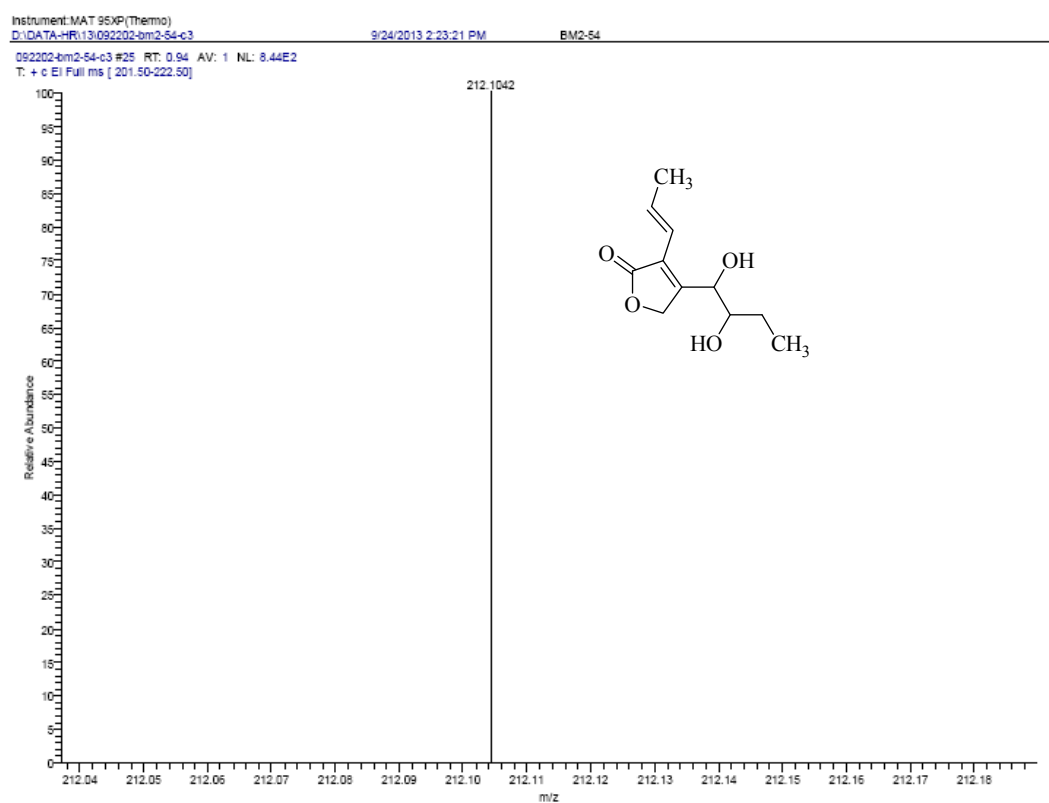

**Figure S11.**  $^1\text{H}$ -NMR spectrum of Pestalafuranone I (**6**) (400 MHz,  $\text{CDCl}_3$ ).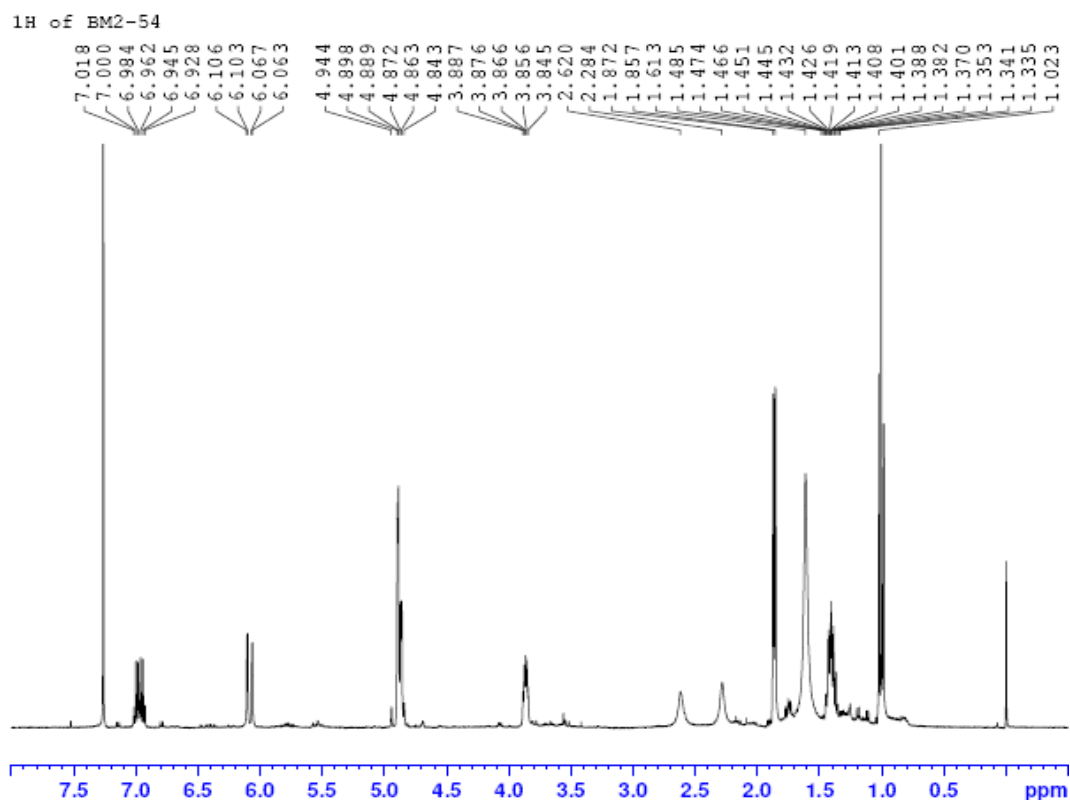**Figure S12.**  $^{13}\text{C}$ -NMR spectrum of Pestalafuranone I (**6**) (100 MHz,  $\text{CDCl}_3$ ).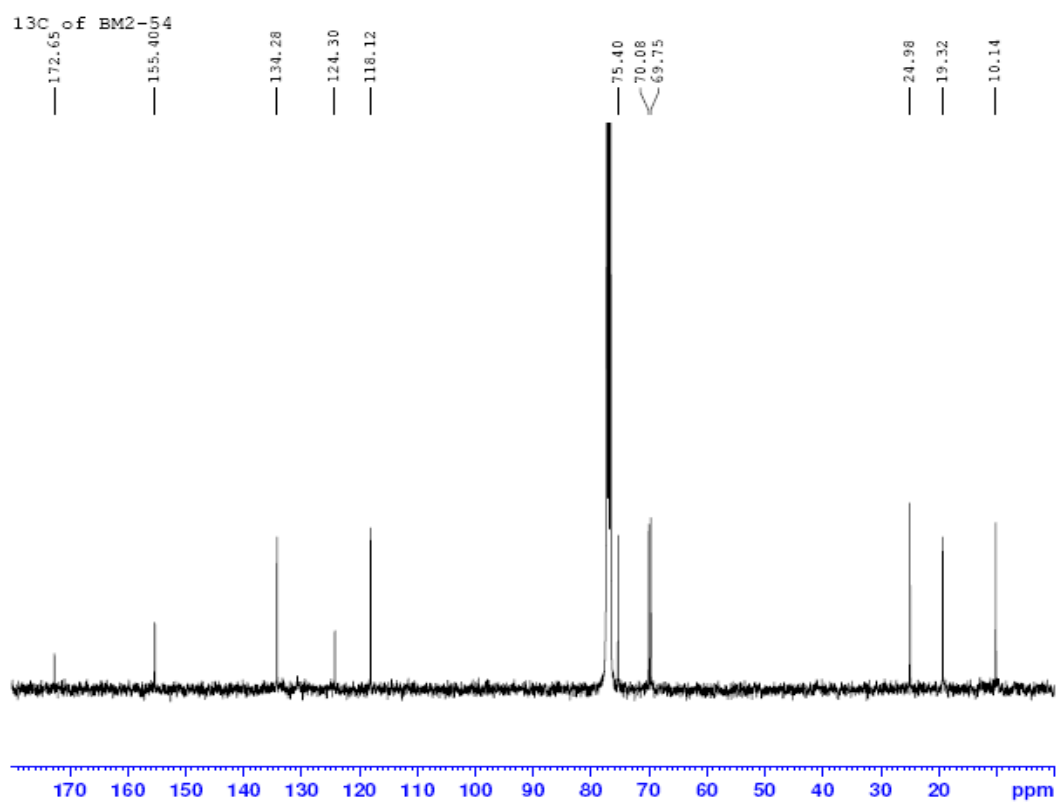

**Figure S13.** HREIMS spectrum of Pestalafuranone J (7).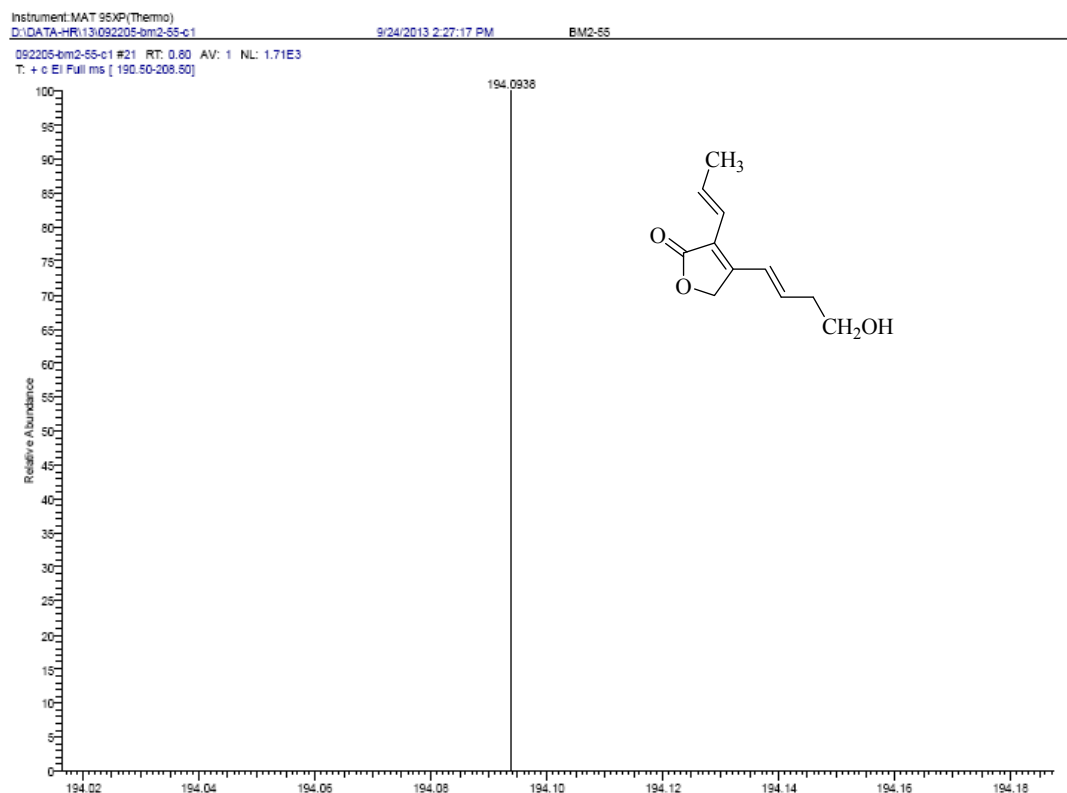**Figure S14.**  $^1\text{H}$ -NMR spectrum of Pestalafuranone J (7) (400 MHz,  $\text{CDCl}_3$ ).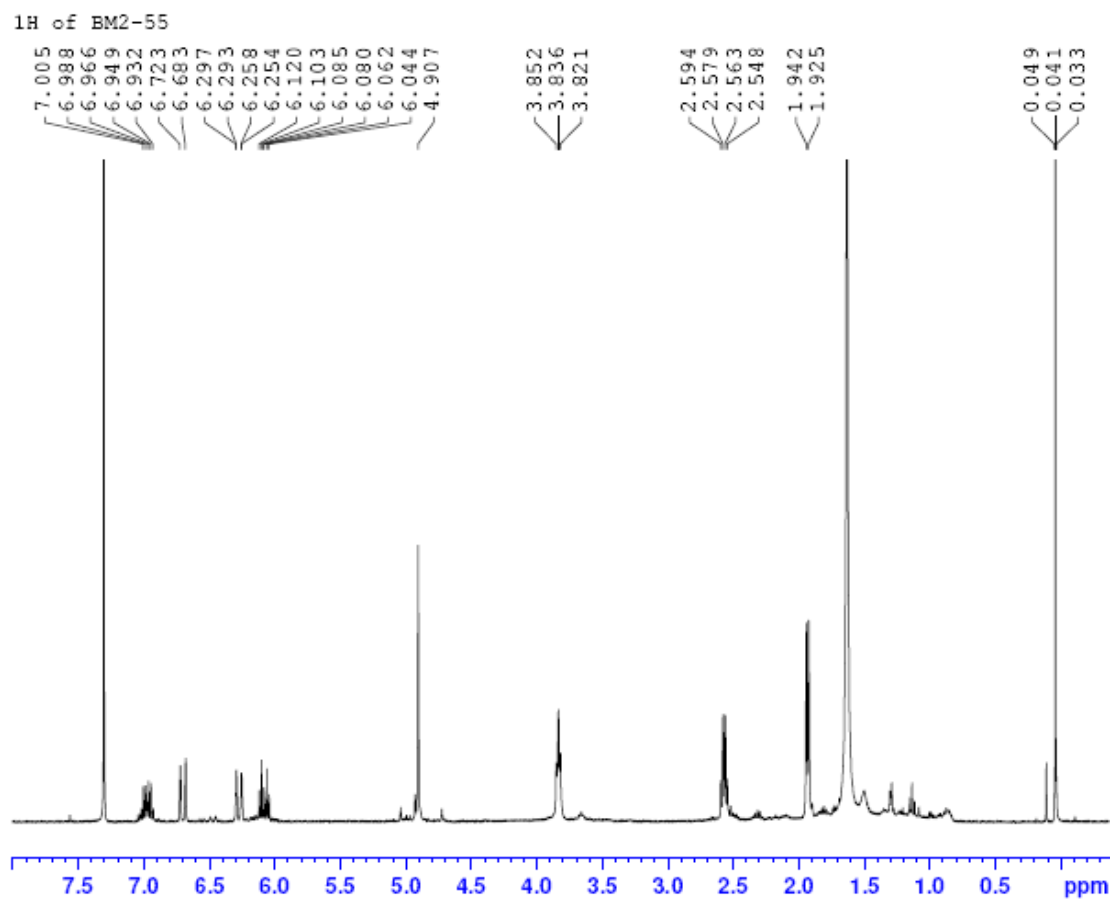

**Figure S15.**  $^{13}\text{C}$ -NMR spectrum of Pestalafuranone J (7) (100 MHz,  $\text{CDCl}_3$ ).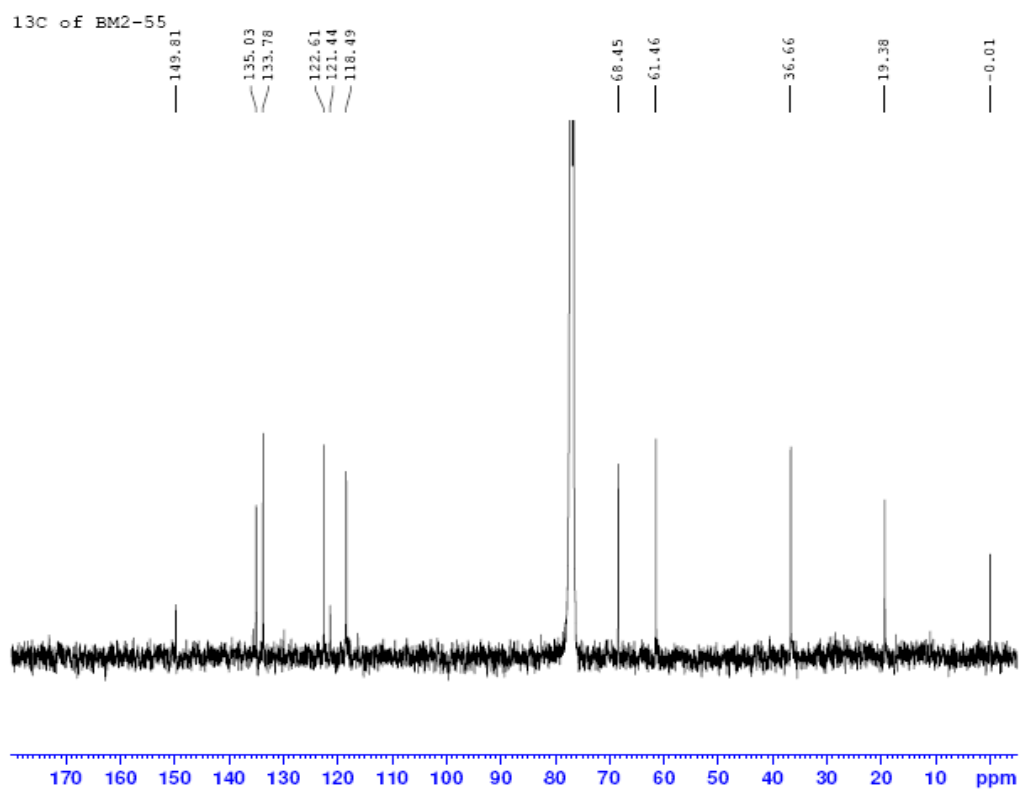

Supplement: Supplementary file 1 [file molecules-19-00819-s001.pdf]
